# Supplementary material for: Depletion of Abundant Sequences by Hybridization (DASH): using Cas9 to remove unwanted high-abundance species in sequencing libraries and molecular counting applications
Source: PubMed Central journal article supplement (PMC4778327; doi:10.1186/s13059-016-0904-5), 2016-03-04
Supplement: 13059_2016_904_MOESM1_ESM.pdf [file 13059_2016_904_MOESM1_ESM.pdf]

**Supplemental Table 1: sgRNA Target Sequences**

| <b>Name</b> | <b>Target Sequence</b> | <b>Name</b>       | <b>Target Sequence</b> |
|-------------|------------------------|-------------------|------------------------|
| mt-rRNA-1   | ATTTTCAGTGTATTGCTTTG   | mt-rRNA-29        | GGAACAGCTCTTTGGACACT   |
| mt-rRNA-2   | ACATCACCCCATAAACAAAT   | mt-rRNA-30        | GGCTGCTTTTAGGCCTACTA   |
| mt-rRNA-3   | AGGGTGAACCTCACTGGAACG  | mt-rRNA-31        | TTTGGGATTTTTTAGGTAGT   |
| mt-rRNA-4   | TCTAAATCACCACGATCAAA   | mt-rRNA-32        | GATTGGTCCAATTGGGTGTG   |
| mt-rRNA-5   | TTTCCCGTGGGGGTGTGGCT   | mt-rRNA-33        | ACTAACATTAGTTCTTCTAT   |
| mt-rRNA-6   | AAACTTTCGTTTATTGCTAA   | mt-rRNA-34        | TGATCTGACGCAGGCTTATG   |
| mt-rRNA-7   | AATCGTGTGACCGCGGTGGC   | mt-rRNA-35        | TGTTGGTTGATTGTAGATAT   |
| mt-rRNA-8   | ATCTAAAACACTCTTTACGC   | mt-rRNA-36        | CTTATGAGCATGCCTGTGTT   |
| mt-rRNA-9   | ACTGGAGTTTTTTACAACCTC  | mt-rRNA-37        | GAAAGGTTAAAAAAGTAAA    |
| mt-rRNA-10  | CACAAAATAGACTACGAAAG   | mt-rRNA-38        | GCAGGCGGTGCCTCTAATAC   |
| mt-rRNA-11  | GGGGTATCTAATCCCAGTTT   | mt-rRNA-39        | TTTGCACGGTTAGGGTACCG   |
| mt-rRNA-12  | GATTTAACTGTTGAGGTTTA   | mt-rRNA-40        | CCTCGTGGAGCCATTCATAC   |
| mt-rRNA-13  | GTCCTTTGAGTTTTAAGCTG   | mt-rRNA-41        | CACGGGCAGGTCAATTTACAC  |
| mt-rRNA-14  | ACAGAACAGGCTCCTCTAGA   | mt-rRNA-42        | TAATAAATTAAGCTCCATA    |
| mt-rRNA-15  | TATATAGGCTGAGCAAGAGG   | mt-rRNA-43        | TTAGGACCTGTGGGTTTGT    |
| mt-rRNA-16  | TCTTCAGCAAACCCTGATGA   | mt-rRNA-44        | TGCATTAATAATTTTCGGTTG  |
| mt-rRNA-17  | CCCATTTCTTGCCACCTCAT   | mt-rRNA-45        | AAGTCTTAGCATGTACTGCT   |
| mt-rRNA-18  | TCGACCCTTAAGTTTCATAA   | mt-rRNA-46        | TGTTCCGTTGGTCAAGTTAT   |
| mt-rRNA-19  | TGAAACTTAAGGGTCTGAAGG  | mt-rRNA-47        | GTTGATATGGACTCTAGAAT   |
| mt-rRNA-20  | GTATACTTGAGGAGGGTGAC   | mt-rRNA-48        | TACGACCTCGATGTTGGATC   |
| mt-rRNA-21  | CTTTGTGTTAAGCTACACTC   | mt-rRNA-49        | GATGGTGCAGCCGCTATTAA   |
| mt-rRNA-22  | AAGGTTGTCTGGTAGTAAGG   | mt-rRNA-50        | GGTCTGAACTCAGATCACGT   |
| mt-rRNA-23  | CATTTACCCAAATAAAGTAT   | mt-rRNA-51        | TCTTGTCTTTTCGTACAGGG   |
| mt-rRNA-24  | AGTCCTTGCTATATTATGCT   | mt-rRNA-52        | TGAGATGATATCATTTACGG   |
| mt-rRNA-25  | TAAC TAGAAATAACTTTGCA  | mt-rRNA-53        | CCCACACCCACCCAAGAACA   |
| mt-rRNA-26  | CACTATTTTGCTACATAGAC   | mt-rRNA-54        | ACTTAAACTTTACAGTCAG    |
| mt-rRNA-27  | CTACCGAGCCTGGTGATAGC   | KRAS WT           | AAACTTGTGGTAGTTGGAGC   |
| mt-rRNA-28  | AGGGGATTTAGAGGGTTCTG   | Non-human control | ACAAATATTTTAATACATGA   |
