# Supplementary material for: Depletion of Abundant Sequences by Hybridization (DASH): using Cas9 to remove unwanted high-abundance species in sequencing libraries and molecular counting applications
Source: PubMed Central journal article supplement (PMC4778327; doi:10.1186/s13059-016-0904-5), 2016-03-04
Supplement: 13059_2016_904_MOESM2_ESM.pdf [file 13059_2016_904_MOESM2_ESM.pdf]

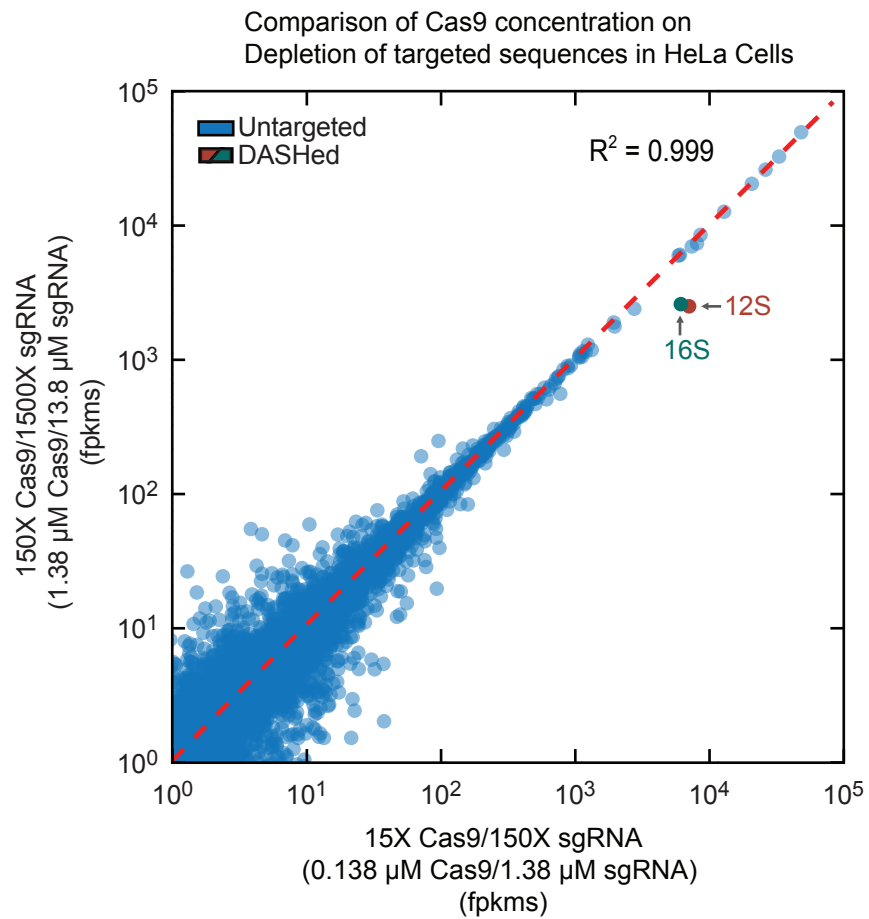

**Supplemental Figure 1:** Scatterplot of log of fragments per kilobase of transcript per million mapped reads (log-fpkms) values per human gene comparing HeLa cells DASHed with two different Cas9/sgRNA concentrations.
