# Supplementary material for: Depletion of Abundant Sequences by Hybridization (DASH): using Cas9 to remove unwanted high-abundance species in sequencing libraries and molecular counting applications
Source: PubMed Central journal article supplement (PMC4778327; doi:10.1186/s13059-016-0904-5), 2016-03-04
Supplement: 13059_2016_904_MOESM4_ESM.pdf [file 13059_2016_904_MOESM4_ESM.pdf]

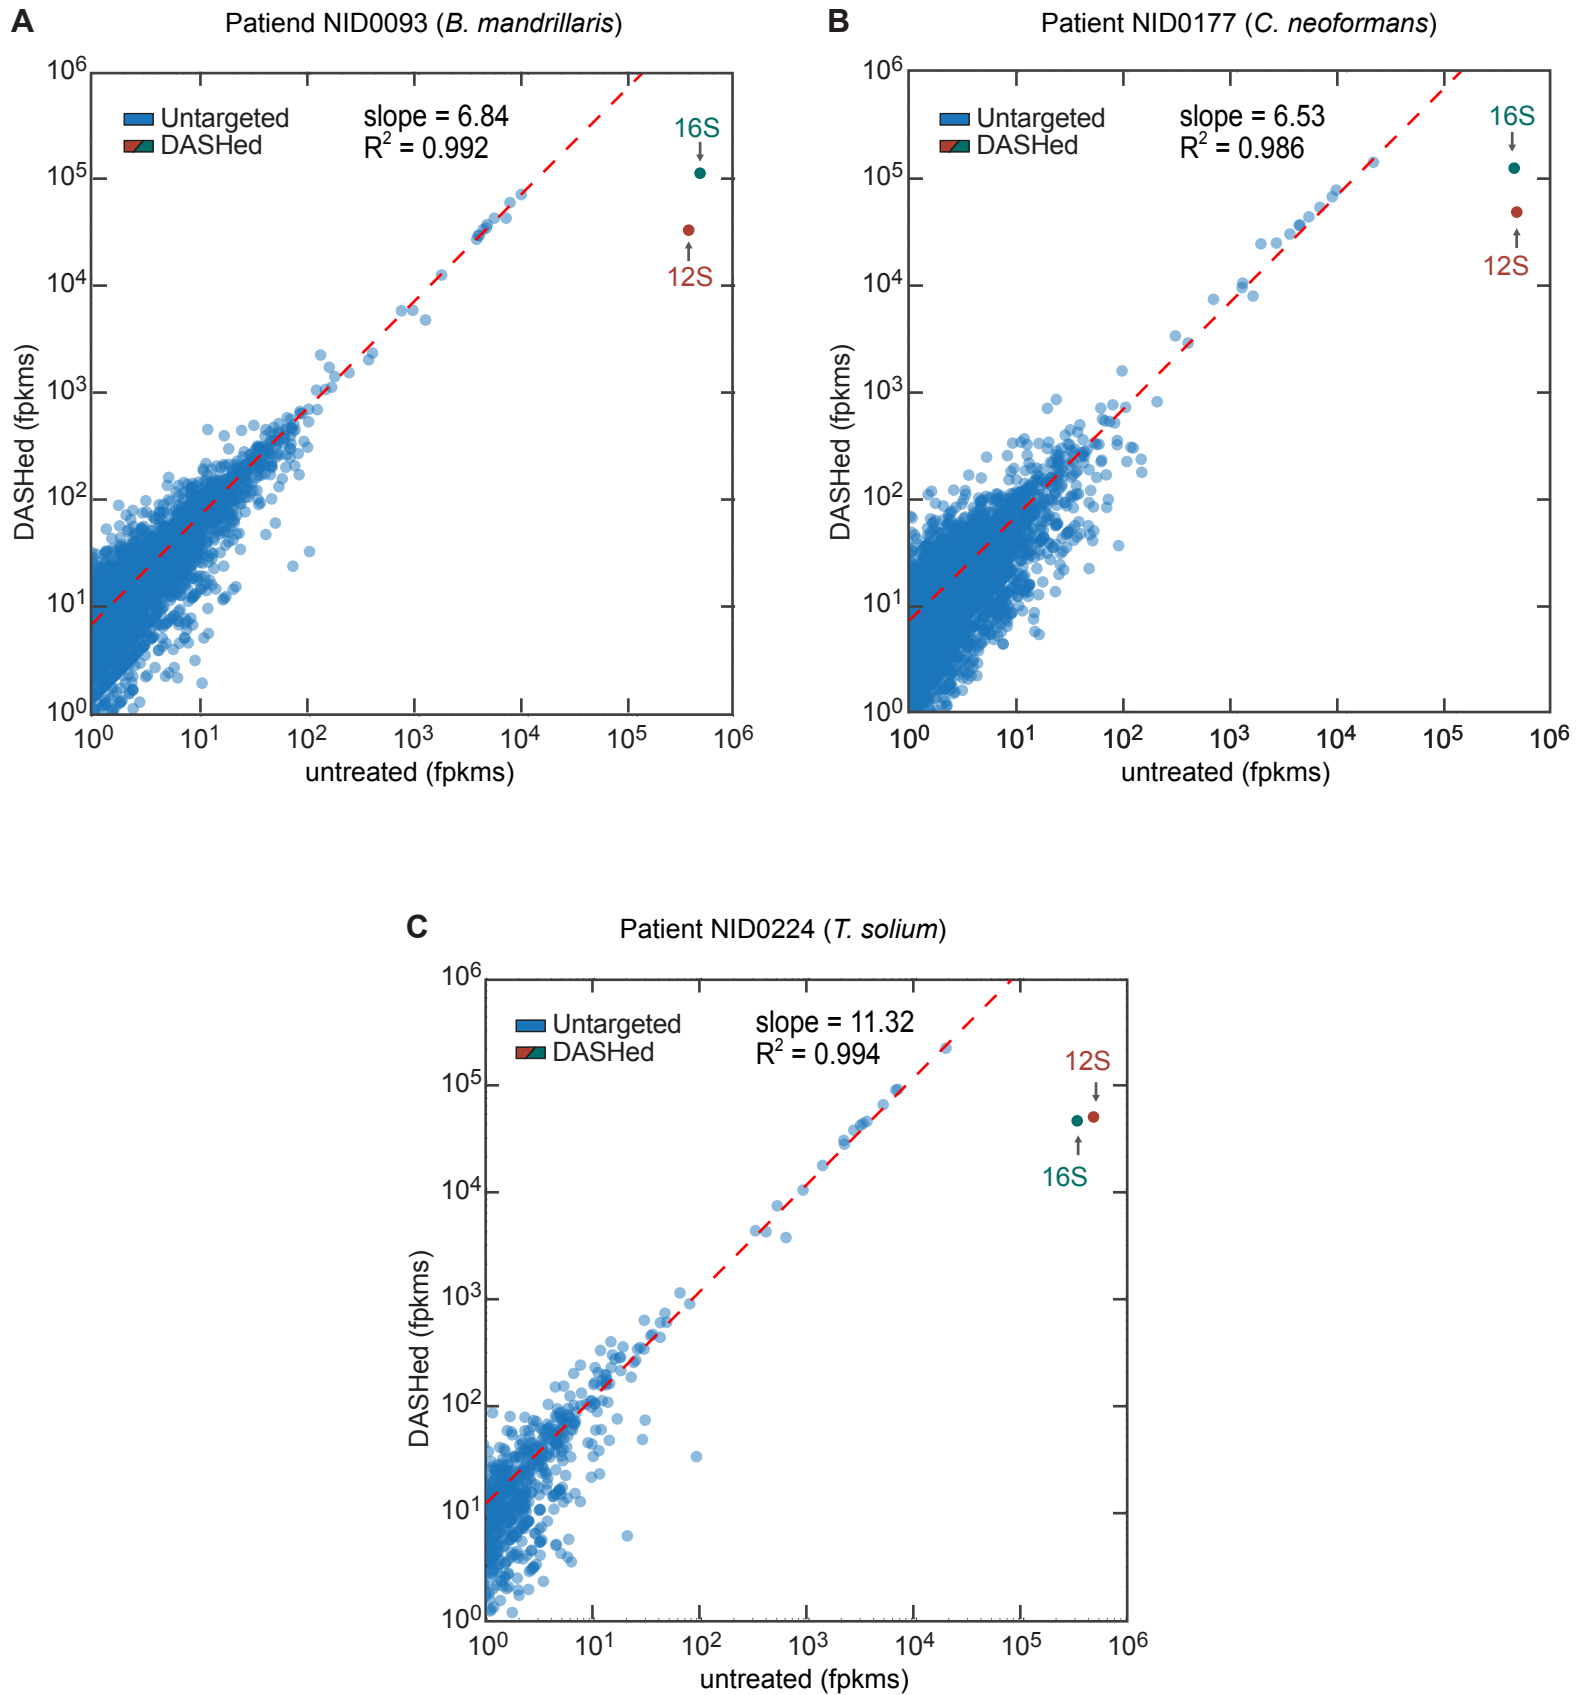

**Supplemental Figure 3:** Scatterplots of the log of fragments per kilobase of transcript per million mapped reads (log-fpkms) values per human gene in the DASHed vs. untreated patient samples. The slopes of the regression lines (red) indicate the fold enrichment in reads mapped to untargeted transcripts. R-squared (R<sup>2</sup>) values of the regression lines indicate minimal off-target depletion.
